# Supplementary material for: Genetic Parameters for Yolk Cholesterol and Transcriptional Evidence Indicate a Role of Lipoprotein Lipase in the Cholesterol Metabolism of the Chinese Wenchang Chicken
Source: Front Genet. 2019 Oct 3;10:902. doi: 10.3389/fgene.2019.00902 (PMC6786094; doi:10.3389/fgene.2019.00902)
Supplement: Supplementary file 6 [file Table_3.xls]

## Sheet: categories
Additional table 3 Differentially expressed genes were subjected to database for Gene Ontology (GO) analysis
Catergory	GO_Term	Cluster frequency	Genome frequency of use	Corrected P-value	Genes annotated to the term
biological_process	GO:0002376 immune system process	90 out of 559 genes, 16.1%	603 out of 9782 genes, 6.2%	1.51e-14	ENSGALG00000002160,ENSGALG00000021139,ENSGALG00000013372,ENSGALG00000022750,ENSGALG00000012056,ENSGALG00000002113,ENSGALG00000043052,ENSGALG00000014127,ENSGALG00000043065,ENSGALG00000007579,ENSGALG00000010592,ENSGALG00000006973,ENSGALG00000006756,ENSGALG00000032717,ENSGALG00000007511,ENSGALG00000000141,ENSGALG00000013218,ENSGALG00000011492,ENSGALG00000028256,ENSGALG00000024083,ENSGALG00000014754,…
biological_process	GO:0098602 single organism cell adhesion	33 out of 559 genes, 5.9%	193 out of 9782 genes, 2.0%	2.57e-05	ENSGALG00000002160,ENSGALG00000002080,ENSGALG00000013372,ENSGALG00000000466,ENSGALG00000022750,ENSGALG00000007579,ENSGALG00000002816,ENSGALG00000000299,ENSGALG00000002175,ENSGALG00000007511,ENSGALG00000015216,ENSGALG00000028256,ENSGALG00000011434,ENSGALG00000013293,ENSGALG00000007874,ENSGALG00000007412,ENSGALG00000011696,ENSGALG00000008756,ENSGALG00000004594,ENSGALG00000004398,ENSGALG00000007416,…
biological_process	GO:0002253 activation of immune response	20 out of 559 genes, 3.6%	82 out of 9782 genes, 0.8%	4.91e-05	ENSGALG00000005644,ENSGALG00000034722,ENSGALG00000002113,ENSGALG00000039327,ENSGALG00000014561,ENSGALG00000004771,ENSGALG00000000251,ENSGALG00000021569,ENSGALG00000016590,ENSGALG00000015216,ENSGALG00000013218,ENSGALG00000023411,ENSGALG00000007001,ENSGALG00000014754,ENSGALG00000027093,ENSGALG00000002192,ENSGALG00000016661,ENSGALG00000016719,ENSGALG00000004496,ENSGALG00000007416
biological_process	GO:0007159 leukocyte cell-cell adhesion	24 out of 559 genes, 4.3%	115 out of 9782 genes, 1.2%	5.25e-05	ENSGALG00000016986,ENSGALG00000002160,ENSGALG00000002080,ENSGALG00000024272,ENSGALG00000013372,ENSGALG00000000466,ENSGALG00000022750,ENSGALG00000034975,ENSGALG00000007579,ENSGALG00000002816,ENSGALG00000007511,ENSGALG00000015216,ENSGALG00000028256,ENSGALG00000012456,ENSGALG00000011434,ENSGALG00000007874,ENSGALG00000011696,ENSGALG00000004496,ENSGALG00000038559,ENSGALG00000043603,ENSGALG00000004594,…
biological_process	GO:0045087 innate immune response	25 out of 559 genes, 4.5%	124 out of 9782 genes, 1.3%	5.57e-05	ENSGALG00000000736,ENSGALG00000002160,ENSGALG00000024272,ENSGALG00000034722,ENSGALG00000029367,ENSGALG00000012056,ENSGALG00000014561,ENSGALG00000014127,ENSGALG00000016590,ENSGALG00000032717,ENSGALG00000013356,ENSGALG00000015216,ENSGALG00000028256,ENSGALG00000007001,ENSGALG00000014754,ENSGALG00000016564,ENSGALG00000027093,ENSGALG00000011434,ENSGALG00000011551,ENSGALG00000016661,ENSGALG00000008340,…
biological_process	GO:0098609 cell-cell adhesion	37 out of 559 genes, 6.6%	240 out of 9782 genes, 2.5%	5.9e-05	ENSGALG00000002160,ENSGALG00000002080,ENSGALG00000013372,ENSGALG00000000466,ENSGALG00000022750,ENSGALG00000007579,ENSGALG00000002816,ENSGALG00000000299,ENSGALG00000007511,ENSGALG00000015216,ENSGALG00000008716,ENSGALG00000028256,ENSGALG00000011434,ENSGALG00000013293,ENSGALG00000007874,ENSGALG00000007412,ENSGALG00000011696,ENSGALG00000008756,ENSGALG00000004594,ENSGALG00000004398,ENSGALG00000007416,…
biological_process	GO:0002757 immune response-activating signal transduction	18 out of 559 genes, 3.2%	68 out of 9782 genes, 0.7%	6.32e-05	ENSGALG00000005644,ENSGALG00000034722,ENSGALG00000002113,ENSGALG00000039327,ENSGALG00000014561,ENSGALG00000000251,ENSGALG00000016590,ENSGALG00000015216,ENSGALG00000013218,ENSGALG00000023411,ENSGALG00000007001,ENSGALG00000014754,ENSGALG00000027093,ENSGALG00000002192,ENSGALG00000016661,ENSGALG00000016719,ENSGALG00000004496,ENSGALG00000007416
biological_process	GO:0016337 single organismal cell-cell adhesion	31 out of 559 genes, 5.5%	181 out of 9782 genes, 1.9%	6.93e-05	ENSGALG00000016986,ENSGALG00000002160,ENSGALG00000002080,ENSGALG00000024272,ENSGALG00000013372,ENSGALG00000000466,ENSGALG00000022750,ENSGALG00000014561,ENSGALG00000034975,ENSGALG00000007579,ENSGALG00000002816,ENSGALG00000000299,ENSGALG00000007511,ENSGALG00000015216,ENSGALG00000028256,ENSGALG00000012456,ENSGALG00000011434,ENSGALG00000013293,ENSGALG00000007874,ENSGALG00000007412,ENSGALG00000011696,…
biological_process	GO:0007155 cell adhesion	48 out of 559 genes, 8.6%	364 out of 9782 genes, 3.7%	8.64e-05	ENSGALG00000002160,ENSGALG00000002080,ENSGALG00000013372,ENSGALG00000005644,ENSGALG00000000466,ENSGALG00000022750,ENSGALG00000007579,ENSGALG00000002816,ENSGALG00000000299,ENSGALG00000005321,ENSGALG00000002175,ENSGALG00000007511,ENSGALG00000015216,ENSGALG00000008716,ENSGALG00000028256,ENSGALG00000011434,ENSGALG00000013293,ENSGALG00000007874,ENSGALG00000011203,ENSGALG00000008340,ENSGALG00000007412,…
biological_process	GO:0050776 regulation of immune response	35 out of 559 genes, 6.3%	224 out of 9782 genes, 2.3%	0.0001	ENSGALG00000002160,ENSGALG00000009920,ENSGALG00000013372,ENSGALG00000005644,ENSGALG00000034722,ENSGALG00000002113,ENSGALG00000039327,ENSGALG00000004771,ENSGALG00000012973,ENSGALG00000014127,ENSGALG00000015216,ENSGALG00000013218,ENSGALG00000014754,ENSGALG00000007001,ENSGALG00000027093,ENSGALG00000011434,ENSGALG00000002192,ENSGALG00000008340,ENSGALG00000004594,ENSGALG00000004398,ENSGALG00000002028,…
biological_process	GO:0022610 biological adhesion	48 out of 559 genes, 8.6%	367 out of 9782 genes, 3.8%	0.00011	ENSGALG00000002160,ENSGALG00000002080,ENSGALG00000013372,ENSGALG00000005644,ENSGALG00000000466,ENSGALG00000022750,ENSGALG00000007579,ENSGALG00000002816,ENSGALG00000000299,ENSGALG00000005321,ENSGALG00000002175,ENSGALG00000007511,ENSGALG00000015216,ENSGALG00000008716,ENSGALG00000028256,ENSGALG00000011434,ENSGALG00000013293,ENSGALG00000007874,ENSGALG00000011203,ENSGALG00000008340,ENSGALG00000007412,…
biological_process	GO:0002764 immune response-regulating signaling pathway	18 out of 559 genes, 3.2%	73 out of 9782 genes, 0.7%	0.0002	ENSGALG00000005644,ENSGALG00000034722,ENSGALG00000002113,ENSGALG00000039327,ENSGALG00000014561,ENSGALG00000000251,ENSGALG00000016590,ENSGALG00000015216,ENSGALG00000013218,ENSGALG00000023411,ENSGALG00000007001,ENSGALG00000014754,ENSGALG00000027093,ENSGALG00000002192,ENSGALG00000016661,ENSGALG00000016719,ENSGALG00000004496,ENSGALG00000007416
biological_process	GO:0046649 lymphocyte activation	26 out of 559 genes, 4.7%	145 out of 9782 genes, 1.5%	0.00035	ENSGALG00000016986,ENSGALG00000002160,ENSGALG00000002080,ENSGALG00000013372,ENSGALG00000000466,ENSGALG00000022750,ENSGALG00000034975,ENSGALG00000008257,ENSGALG00000007579,ENSGALG00000000251,ENSGALG00000006415,ENSGALG00000006973,ENSGALG00000015216,ENSGALG00000023411,ENSGALG00000028256,ENSGALG00000007001,ENSGALG00000016564,ENSGALG00000011434,ENSGALG00000007874,ENSGALG00000012442,ENSGALG00000011696,…
biological_process	GO:0001775 cell activation	32 out of 559 genes, 5.7%	206 out of 9782 genes, 2.1%	0.00044	ENSGALG00000002160,ENSGALG00000002080,ENSGALG00000013372,ENSGALG00000000466,ENSGALG00000022750,ENSGALG00000002113,ENSGALG00000007579,ENSGALG00000006415,ENSGALG00000006973,ENSGALG00000015216,ENSGALG00000028256,ENSGALG00000024083,ENSGALG00000007001,ENSGALG00000011434,ENSGALG00000007874,ENSGALG00000012442,ENSGALG00000011696,ENSGALG00000008756,ENSGALG00000004594,ENSGALG00000004398,ENSGALG00000007416,…
biological_process	GO:0060326 cell chemotaxis	17 out of 559 genes, 3.0%	69 out of 9782 genes, 0.7%	0.00048	ENSGALG00000024272,ENSGALG00000039327,ENSGALG00000027716,ENSGALG00000043065,ENSGALG00000013929,ENSGALG00000032717,ENSGALG00000007511,ENSGALG00000010338,ENSGALG00000015216,ENSGALG00000013218,ENSGALG00000028256,ENSGALG00000002112,ENSGALG00000014585,ENSGALG00000000949,ENSGALG00000043603,ENSGALG00000006388,ENSGALG00000002329
biological_process	GO:0045321 leukocyte activation	28 out of 559 genes, 5.0%	167 out of 9782 genes, 1.7%	0.00051	ENSGALG00000016986,ENSGALG00000002160,ENSGALG00000002080,ENSGALG00000013372,ENSGALG00000000466,ENSGALG00000022750,ENSGALG00000002113,ENSGALG00000034975,ENSGALG00000008257,ENSGALG00000007579,ENSGALG00000000251,ENSGALG00000006415,ENSGALG00000006973,ENSGALG00000015216,ENSGALG00000023411,ENSGALG00000028256,ENSGALG00000016564,ENSGALG00000007001,ENSGALG00000011434,ENSGALG00000007874,ENSGALG00000012442,…
biological_process	GO:0070486 leukocyte aggregation	21 out of 559 genes, 3.8%	106 out of 9782 genes, 1.1%	0.001	ENSGALG00000016986,ENSGALG00000002160,ENSGALG00000002080,ENSGALG00000024272,ENSGALG00000013372,ENSGALG00000000466,ENSGALG00000022750,ENSGALG00000034975,ENSGALG00000002816,ENSGALG00000007579,ENSGALG00000015216,ENSGALG00000012456,ENSGALG00000028256,ENSGALG00000011434,ENSGALG00000007874,ENSGALG00000011696,ENSGALG00000038559,ENSGALG00000004594,ENSGALG00000004398,ENSGALG00000007625,ENSGALG00000007416
biological_process	GO:0071621 granulocyte chemotaxis	10 out of 559 genes, 1.8%	25 out of 9782 genes, 0.3%	0.00115	ENSGALG00000028256,ENSGALG00000024272,ENSGALG00000002112,ENSGALG00000039327,ENSGALG00000014585,ENSGALG00000043603,ENSGALG00000002329,ENSGALG00000007511,ENSGALG00000032717,ENSGALG00000015216
biological_process	GO:0009605 response to external stimulus	60 out of 559 genes, 10.7%	546 out of 9782 genes, 5.6%	0.0013	ENSGALG00000026373,ENSGALG00000002160,ENSGALG00000002080,ENSGALG00000009920,ENSGALG00000015143,ENSGALG00000003217,ENSGALG00000034722,ENSGALG00000039327,ENSGALG00000027716,ENSGALG00000023622,ENSGALG00000043065,ENSGALG00000006756,ENSGALG00000013929,ENSGALG00000011251,ENSGALG00000032717,ENSGALG00000010338,ENSGALG00000007511,ENSGALG00000015216,ENSGALG00000008716,ENSGALG00000001774,ENSGALG00000013218,…
biological_process	GO:0042127 regulation of cell proliferation	63 out of 559 genes, 11.3%	585 out of 9782 genes, 6.0%	0.00135	ENSGALG00000003537,ENSGALG00000025898,ENSGALG00000006992,ENSGALG00000012056,ENSGALG00000039327,ENSGALG00000012973,ENSGALG00000014127,ENSGALG00000012680,ENSGALG00000006415,ENSGALG00000002781,ENSGALG00000002175,ENSGALG00000015216,ENSGALG00000010170,ENSGALG00000011492,ENSGALG00000007001,ENSGALG00000000902,ENSGALG00000007874,ENSGALG00000009784,ENSGALG00000011203,ENSGALG00000008340,ENSGALG00000012115,…
biological_process	GO:0071593 lymphocyte aggregation	20 out of 559 genes, 3.6%	103 out of 9782 genes, 1.1%	0.00264	ENSGALG00000016986,ENSGALG00000002160,ENSGALG00000002080,ENSGALG00000013372,ENSGALG00000000466,ENSGALG00000022750,ENSGALG00000034975,ENSGALG00000002816,ENSGALG00000007579,ENSGALG00000015216,ENSGALG00000012456,ENSGALG00000028256,ENSGALG00000011434,ENSGALG00000007874,ENSGALG00000011696,ENSGALG00000038559,ENSGALG00000004594,ENSGALG00000004398,ENSGALG00000007625,ENSGALG00000007416
biological_process	GO:0002252 immune effector process	23 out of 559 genes, 4.1%	131 out of 9782 genes, 1.3%	0.00272	ENSGALG00000016986,ENSGALG00000001889,ENSGALG00000026373,ENSGALG00000002080,ENSGALG00000005644,ENSGALG00000014561,ENSGALG00000004771,ENSGALG00000034975,ENSGALG00000007579,ENSGALG00000006415,ENSGALG00000021569,ENSGALG00000016590,ENSGALG00000015216,ENSGALG00000023411,ENSGALG00000024083,ENSGALG00000007001,ENSGALG00000014754,ENSGALG00000016564,ENSGALG00000011434,ENSGALG00000012442,ENSGALG00000038559,…
biological_process	GO:0002429 immune response-activating cell surface receptor signaling pathway	12 out of 559 genes, 2.1%	40 out of 9782 genes, 0.4%	0.0031	ENSGALG00000013218,ENSGALG00000014754,ENSGALG00000005644,ENSGALG00000016719,ENSGALG00000016661,ENSGALG00000002192,ENSGALG00000002113,ENSGALG00000039327,ENSGALG00000014561,ENSGALG00000000251,ENSGALG00000007416,ENSGALG00000015216
biological_process	GO:0030593 neutrophil chemotaxis	9 out of 559 genes, 1.6%	22 out of 9782 genes, 0.2%	0.00349	ENSGALG00000028256,ENSGALG00000024272,ENSGALG00000002112,ENSGALG00000039327,ENSGALG00000014585,ENSGALG00000002329,ENSGALG00000007511,ENSGALG00000032717,ENSGALG00000015216
biological_process	GO:0097530 granulocyte migration	10 out of 559 genes, 1.8%	28 out of 9782 genes, 0.3%	0.00397	ENSGALG00000028256,ENSGALG00000024272,ENSGALG00000002112,ENSGALG00000039327,ENSGALG00000014585,ENSGALG00000043603,ENSGALG00000002329,ENSGALG00000007511,ENSGALG00000032717,ENSGALG00000015216
biological_process	GO:0019221 cytokine-mediated signaling pathway	23 out of 559 genes, 4.1%	135 out of 9782 genes, 1.4%	0.00467	ENSGALG00000004221,ENSGALG00000009965,ENSGALG00000013372,ENSGALG00000005638,ENSGALG00000032717,ENSGALG00000010589,ENSGALG00000012472,ENSGALG00000008716,ENSGALG00000011733,ENSGALG00000016564,ENSGALG00000028256,ENSGALG00000002112,ENSGALG00000026207,ENSGALG00000007874,ENSGALG00000016719,ENSGALG00000003747,ENSGALG00000014585,ENSGALG00000016693,ENSGALG00000043603,ENSGALG00000005725,ENSGALG00000004594,…
biological_process	GO:0050900 leukocyte migration	15 out of 559 genes, 2.7%	66 out of 9782 genes, 0.7%	0.00749	ENSGALG00000013218,ENSGALG00000028256,ENSGALG00000024272,ENSGALG00000002112,ENSGALG00000006992,ENSGALG00000005644,ENSGALG00000039327,ENSGALG00000034975,ENSGALG00000014585,ENSGALG00000043603,ENSGALG00000002329,ENSGALG00000006388,ENSGALG00000032717,ENSGALG00000007511,ENSGALG00000015216
biological_process	GO:0002768 immune response-regulating cell surface receptor signaling pathway	12 out of 559 genes, 2.1%	44 out of 9782 genes, 0.4%	0.00949	ENSGALG00000013218,ENSGALG00000014754,ENSGALG00000005644,ENSGALG00000016719,ENSGALG00000016661,ENSGALG00000002192,ENSGALG00000002113,ENSGALG00000039327,ENSGALG00000014561,ENSGALG00000000251,ENSGALG00000007416,ENSGALG00000015216
biological_process	GO:1990266 neutrophil migration	9 out of 559 genes, 1.6%	25 out of 9782 genes, 0.3%	0.01228	ENSGALG00000028256,ENSGALG00000024272,ENSGALG00000002112,ENSGALG00000039327,ENSGALG00000014585,ENSGALG00000002329,ENSGALG00000007511,ENSGALG00000032717,ENSGALG00000015216
biological_process	GO:0048584 positive regulation of response to stimulus	72 out of 559 genes, 12.9%	749 out of 9782 genes, 7.7%	0.0144	ENSGALG00000002160,ENSGALG00000009920,ENSGALG00000003217,ENSGALG00000025898,ENSGALG00000022750,ENSGALG00000002113,ENSGALG00000014127,ENSGALG00000006973,ENSGALG00000026167,ENSGALG00000032717,ENSGALG00000010170,ENSGALG00000001774,ENSGALG00000013218,ENSGALG00000028256,ENSGALG00000024083,ENSGALG00000014754,ENSGALG00000012442,ENSGALG00000008756,ENSGALG00000007785,ENSGALG00000012801,ENSGALG00000006527,…
biological_process	GO:0030098 lymphocyte differentiation	19 out of 559 genes, 3.4%	105 out of 9782 genes, 1.1%	0.01455	ENSGALG00000002160,ENSGALG00000002080,ENSGALG00000013372,ENSGALG00000000466,ENSGALG00000022750,ENSGALG00000034975,ENSGALG00000000251,ENSGALG00000008257,ENSGALG00000006415,ENSGALG00000006973,ENSGALG00000015216,ENSGALG00000016564,ENSGALG00000012442,ENSGALG00000011696,ENSGALG00000038559,ENSGALG00000004594,ENSGALG00000004398,ENSGALG00000007625,ENSGALG00000007416
biological_process	GO:0018108 peptidyl-tyrosine phosphorylation	17 out of 559 genes, 3.0%	89 out of 9782 genes, 0.9%	0.02102	ENSGALG00000000736,ENSGALG00000000466,ENSGALG00000012056,ENSGALG00000014561,ENSGALG00000014127,ENSGALG00000008257,ENSGALG00000007646,ENSGALG00000013929,ENSGALG00000015216,ENSGALG00000004958,ENSGALG00000016564,ENSGALG00000008340,ENSGALG00000016661,ENSGALG00000015874,ENSGALG00000005725,ENSGALG00000004398,ENSGALG00000005094
biological_process	GO:0042742 defense response to bacterium	13 out of 559 genes, 2.3%	55 out of 9782 genes, 0.6%	0.02136	ENSGALG00000001889,ENSGALG00000002160,ENSGALG00000009920,ENSGALG00000014754,ENSGALG00000007001,ENSGALG00000019845,ENSGALG00000011551,ENSGALG00000011434,ENSGALG00000027165,ENSGALG00000015795,ENSGALG00000023622,ENSGALG00000006756,ENSGALG00000015216
biological_process	GO:0018212 peptidyl-tyrosine modification	17 out of 559 genes, 3.0%	91 out of 9782 genes, 0.9%	0.02864	ENSGALG00000000736,ENSGALG00000000466,ENSGALG00000012056,ENSGALG00000014561,ENSGALG00000014127,ENSGALG00000008257,ENSGALG00000007646,ENSGALG00000013929,ENSGALG00000015216,ENSGALG00000004958,ENSGALG00000016564,ENSGALG00000008340,ENSGALG00000016661,ENSGALG00000015874,ENSGALG00000005725,ENSGALG00000004398,ENSGALG00000005094
biological_process	GO:0070489 T cell aggregation	18 out of 559 genes, 3.2%	101 out of 9782 genes, 1.0%	0.03162	ENSGALG00000016986,ENSGALG00000002160,ENSGALG00000002080,ENSGALG00000013372,ENSGALG00000000466,ENSGALG00000022750,ENSGALG00000034975,ENSGALG00000007579,ENSGALG00000015216,ENSGALG00000028256,ENSGALG00000011434,ENSGALG00000007874,ENSGALG00000011696,ENSGALG00000038559,ENSGALG00000004594,ENSGALG00000004398,ENSGALG00000007625,ENSGALG00000007416
biological_process	GO:0042110 T cell activation	18 out of 559 genes, 3.2%	101 out of 9782 genes, 1.0%	0.03162	ENSGALG00000016986,ENSGALG00000002160,ENSGALG00000002080,ENSGALG00000013372,ENSGALG00000000466,ENSGALG00000022750,ENSGALG00000034975,ENSGALG00000007579,ENSGALG00000015216,ENSGALG00000028256,ENSGALG00000011434,ENSGALG00000007874,ENSGALG00000011696,ENSGALG00000038559,ENSGALG00000004594,ENSGALG00000004398,ENSGALG00000007625,ENSGALG00000007416
biological_process	GO:0009617 response to bacterium	21 out of 559 genes, 3.8%	132 out of 9782 genes, 1.3%	0.03873	ENSGALG00000001889,ENSGALG00000026373,ENSGALG00000002160,ENSGALG00000009920,ENSGALG00000003217,ENSGALG00000019845,ENSGALG00000034722,ENSGALG00000015795,ENSGALG00000023622,ENSGALG00000006756,ENSGALG00000015216,ENSGALG00000023411,ENSGALG00000007001,ENSGALG00000014754,ENSGALG00000011434,ENSGALG00000011551,ENSGALG00000007874,ENSGALG00000016719,ENSGALG00000027165,ENSGALG00000043603,ENSGALG00000004637
biological_process	GO:0034097 response to cytokine	28 out of 559 genes, 5.0%	207 out of 9782 genes, 2.1%	0.03944	ENSGALG00000004221,ENSGALG00000009965,ENSGALG00000006527,ENSGALG00000013372,ENSGALG00000005638,ENSGALG00000032717,ENSGALG00000013356,ENSGALG00000010589,ENSGALG00000012472,ENSGALG00000008716,ENSGALG00000011733,ENSGALG00000028256,ENSGALG00000016564,ENSGALG00000026207,ENSGALG00000002112,ENSGALG00000011434,ENSGALG00000007874,ENSGALG00000016719,ENSGALG00000003747,ENSGALG00000014585,ENSGALG00000016693,…
biological_process	GO:0043085 positive regulation of catalytic activity	60 out of 559 genes, 10.7%	609 out of 9782 genes, 6.2%	0.0438	ENSGALG00000009157,ENSGALG00000002080,ENSGALG00000026781,ENSGALG00000017169,ENSGALG00000013604,ENSGALG00000000466,ENSGALG00000002113,ENSGALG00000039327,ENSGALG00000007093,ENSGALG00000006415,ENSGALG00000017150,ENSGALG00000006973,ENSGALG00000014923,ENSGALG00000011251,ENSGALG00000026167,ENSGALG00000002175,ENSGALG00000032717,ENSGALG00000015216,ENSGALG00000028256,ENSGALG00000005843,ENSGALG00000007001,…
biological_process	GO:0030097 hemopoiesis	30 out of 559 genes, 5.4%	232 out of 9782 genes, 2.4%	0.04843	ENSGALG00000002160,ENSGALG00000002080,ENSGALG00000013372,ENSGALG00000000466,ENSGALG00000022750,ENSGALG00000014561,ENSGALG00000034975,ENSGALG00000008257,ENSGALG00000000251,ENSGALG00000006415,ENSGALG00000010592,ENSGALG00000006973,ENSGALG00000013929,ENSGALG00000003922,ENSGALG00000015216,ENSGALG00000011492,ENSGALG00000016564,ENSGALG00000012442,ENSGALG00000011696,ENSGALG00000008756,ENSGALG00000038559,…
biological_process	GO:0070098 chemokine-mediated signaling pathway	9 out of 559 genes, 1.6%	29 out of 9782 genes, 0.3%	0.04899	ENSGALG00000009965,ENSGALG00000011733,ENSGALG00000028256,ENSGALG00000016564,ENSGALG00000014585,ENSGALG00000043603,ENSGALG00000002329,ENSGALG00000032717,ENSGALG00000037077
biological_process	GO:0019882 antigen processing and presentation	9 out of 559 genes, 1.6%	29 out of 9782 genes, 0.3%	0.04899	ENSGALG00000000141,ENSGALG00000002160,ENSGALG00000011434,ENSGALG00000000775,ENSGALG00000043052,ENSGALG00000038393,ENSGALG00000004594,ENSGALG00000033694,ENSGALG00000000158
cellular_component	GO:0005615 extracellular space	61 out of 559 genes, 10.9%	546 out of 9782 genes, 5.6%	8.21e-05	ENSGALG00000002160,ENSGALG00000015143,ENSGALG00000021139,ENSGALG00000006992,ENSGALG00000027716,ENSGALG00000004771,ENSGALG00000015134,ENSGALG00000006415,ENSGALG00000034860,ENSGALG00000000255,ENSGALG00000006756,ENSGALG00000014997,ENSGALG00000032717,ENSGALG00000008716,ENSGALG00000028256,ENSGALG00000014754,ENSGALG00000037050,ENSGALG00000013293,ENSGALG00000001407,ENSGALG00000007874,ENSGALG00000026736,…
cellular_component	GO:0044459 plasma membrane part	87 out of 559 genes, 15.6%	902 out of 9782 genes, 9.2%	0.00016	ENSGALG00000002160,ENSGALG00000013372,ENSGALG00000022750,ENSGALG00000012056,ENSGALG00000002113,ENSGALG00000014127,ENSGALG00000007579,ENSGALG00000007409,ENSGALG00000007511,ENSGALG00000000141,ENSGALG00000001774,ENSGALG00000017044,ENSGALG00000013218,ENSGALG00000014754,ENSGALG00000008756,ENSGALG00000012620,ENSGALG00000001876,ENSGALG00000028304,ENSGALG00000012298,ENSGALG00000016986,ENSGALG00000006527,…
cellular_component	GO:0000796 condensin complex	5 out of 559 genes, 0.9%	5 out of 9782 genes, 0.1%	0.00018	ENSGALG00000006525,ENSGALG00000015691,ENSGALG00000009553,ENSGALG00000014425,ENSGALG00000001491
cellular_component	GO:0044425 membrane part	228 out of 559 genes, 40.8%	3114 out of 9782 genes, 31.8%	0.00086	ENSGALG00000004221,ENSGALG00000002160,ENSGALG00000029011,ENSGALG00000013377,ENSGALG00000013372,ENSGALG00000006542,ENSGALG00000022750,ENSGALG00000002113,ENSGALG00000014127,ENSGALG00000006131,ENSGALG00000011394,ENSGALG00000028411,ENSGALG00000007409,ENSGALG00000000141,ENSGALG00000012020,ENSGALG00000014754,ENSGALG00000004111,ENSGALG00000007412,ENSGALG00000008756,ENSGALG00000016693,ENSGALG00000014466,…
cellular_component	GO:0005886 plasma membrane	135 out of 559 genes, 24.2%	1650 out of 9782 genes, 16.9%	0.00118	ENSGALG00000004221,ENSGALG00000002160,ENSGALG00000013372,ENSGALG00000022750,ENSGALG00000002113,ENSGALG00000014127,ENSGALG00000002816,ENSGALG00000007409,ENSGALG00000002781,ENSGALG00000000141,ENSGALG00000011492,ENSGALG00000024083,ENSGALG00000014754,ENSGALG00000008756,ENSGALG00000012454,ENSGALG00000001876,ENSGALG00000028304,ENSGALG00000012298,ENSGALG00000016986,ENSGALG00000000997,ENSGALG00000001383,…
cellular_component	GO:0071944 cell periphery	137 out of 559 genes, 24.5%	1695 out of 9782 genes, 17.3%	0.0019	ENSGALG00000004221,ENSGALG00000002160,ENSGALG00000013372,ENSGALG00000022750,ENSGALG00000002113,ENSGALG00000014127,ENSGALG00000002816,ENSGALG00000007409,ENSGALG00000002781,ENSGALG00000000141,ENSGALG00000011492,ENSGALG00000024083,ENSGALG00000014754,ENSGALG00000008756,ENSGALG00000012454,ENSGALG00000001876,ENSGALG00000028304,ENSGALG00000012298,ENSGALG00000016986,ENSGALG00000000997,ENSGALG00000001383,…
cellular_component	GO:0016020 membrane	284 out of 559 genes, 50.8%	4104 out of 9782 genes, 42.0%	0.00275	ENSGALG00000004221,ENSGALG00000002160,ENSGALG00000013377,ENSGALG00000013372,ENSGALG00000006542,ENSGALG00000002816,ENSGALG00000006131,ENSGALG00000003881,ENSGALG00000028411,ENSGALG00000014997,ENSGALG00000007409,ENSGALG00000002615,ENSGALG00000027871,ENSGALG00000014692,ENSGALG00000011492,ENSGALG00000024083,ENSGALG00000014754,ENSGALG00000004111,ENSGALG00000008756,ENSGALG00000016693,ENSGALG00000014466,…
cellular_component	GO:0042611 MHC protein complex	5 out of 559 genes, 0.9%	7 out of 9782 genes, 0.1%	0.00362	ENSGALG00000038393,ENSGALG00000000141,ENSGALG00000002160,ENSGALG00000004594,ENSGALG00000000158
cellular_component	GO:0042101 T cell receptor complex	6 out of 559 genes, 1.1%	11 out of 9782 genes, 0.1%	0.00388	ENSGALG00000007579,ENSGALG00000014754,ENSGALG00000004398,ENSGALG00000014561,ENSGALG00000007416,ENSGALG00000015216
cellular_component	GO:0031234 extrinsic component of cytoplasmic side of plasma membrane	12 out of 559 genes, 2.1%	52 out of 9782 genes, 0.5%	0.00858	ENSGALG00000014914,ENSGALG00000000736,ENSGALG00000016564,ENSGALG00000002549,ENSGALG00000016661,ENSGALG00000012056,ENSGALG00000008340,ENSGALG00000014127,ENSGALG00000004368,ENSGALG00000005094,ENSGALG00000012092,ENSGALG00000015216
cellular_component	GO:0098552 side of membrane	23 out of 559 genes, 4.1%	161 out of 9782 genes, 1.6%	0.01306	ENSGALG00000000736,ENSGALG00000002160,ENSGALG00000013372,ENSGALG00000012056,ENSGALG00000014127,ENSGALG00000000251,ENSGALG00000006415,ENSGALG00000013929,ENSGALG00000015216,ENSGALG00000014914,ENSGALG00000007001,ENSGALG00000014754,ENSGALG00000016564,ENSGALG00000002549,ENSGALG00000016661,ENSGALG00000008340,ENSGALG00000038559,ENSGALG00000004368,ENSGALG00000004594,ENSGALG00000001876,ENSGALG00000005094,…
cellular_component	GO:0019814 immunoglobulin complex	4 out of 559 genes, 0.7%	5 out of 9782 genes, 0.1%	0.01597	ENSGALG00000000251,ENSGALG00000014754,ENSGALG00000011551,ENSGALG00000015216
cellular_component	GO:0042613 MHC class II protein complex	4 out of 559 genes, 0.7%	6 out of 9782 genes, 0.1%	0.04574	ENSGALG00000038393,ENSGALG00000000141,ENSGALG00000004594,ENSGALG00000000158
molecular_function	GO:0005102 receptor binding	63 out of 559 genes, 11.3%	619 out of 9782 genes, 6.3%	0.00179	ENSGALG00000006329,ENSGALG00000002080,ENSGALG00000015143,ENSGALG00000013604,ENSGALG00000000466,ENSGALG00000012056,ENSGALG00000002113,ENSGALG00000039327,ENSGALG00000043065,ENSGALG00000026914,ENSGALG00000006415,ENSGALG00000006973,ENSGALG00000014902,ENSGALG00000015057,ENSGALG00000005321,ENSGALG00000032717,ENSGALG00000010338,ENSGALG00000015216,ENSGALG00000008716,ENSGALG00000028256,ENSGALG00000024083,…
molecular_function	GO:0004715 non-membrane spanning protein tyrosine kinase activity	10 out of 559 genes, 1.8%	34 out of 9782 genes, 0.3%	0.0056	ENSGALG00000004958,ENSGALG00000000736,ENSGALG00000016564,ENSGALG00000000466,ENSGALG00000016661,ENSGALG00000012056,ENSGALG00000008340,ENSGALG00000014127,ENSGALG00000005094,ENSGALG00000015216
molecular_function	GO:0004896 cytokine receptor activity	11 out of 559 genes, 2.0%	44 out of 9782 genes, 0.4%	0.0114	ENSGALG00000004221,ENSGALG00000009965,ENSGALG00000011733,ENSGALG00000002112,ENSGALG00000013372,ENSGALG00000005638,ENSGALG00000003747,ENSGALG00000016693,ENSGALG00000004594,ENSGALG00000037077,ENSGALG00000012472
molecular_function	GO:0008009 chemokine activity	7 out of 559 genes, 1.3%	20 out of 9782 genes, 0.2%	0.03361	ENSGALG00000014585,ENSGALG00000043065,ENSGALG00000043603,ENSGALG00000028256,ENSGALG00000002329,ENSGALG00000032717,ENSGALG00000010338
molecular_function	GO:0042379 chemokine receptor binding	7 out of 559 genes, 1.3%	20 out of 9782 genes, 0.2%	0.03361	ENSGALG00000014585,ENSGALG00000043065,ENSGALG00000043603,ENSGALG00000028256,ENSGALG00000002329,ENSGALG00000032717,ENSGALG00000010338
